# Supplementary material for: A novel and fast responsive turn-on fluorescent probe for the highly selective detection of Cd2+ based on photo-induced electron transfer
Source: Royal Society of Chemistry journal article supplement (doi:10.1039/c9ra06356k), 2019-01-01
Supplement: c9ra06356k1.pdf [file c9ra06356k1.pdf]

Fig. S1 ESI-MS spectrum of ADMPA

20170916LLQ-5\_170915153051 #74 RT: 0.57 AV: 1 NL: 3.11E7  
T: + c ESI Full ms [ 150.00-500.00]

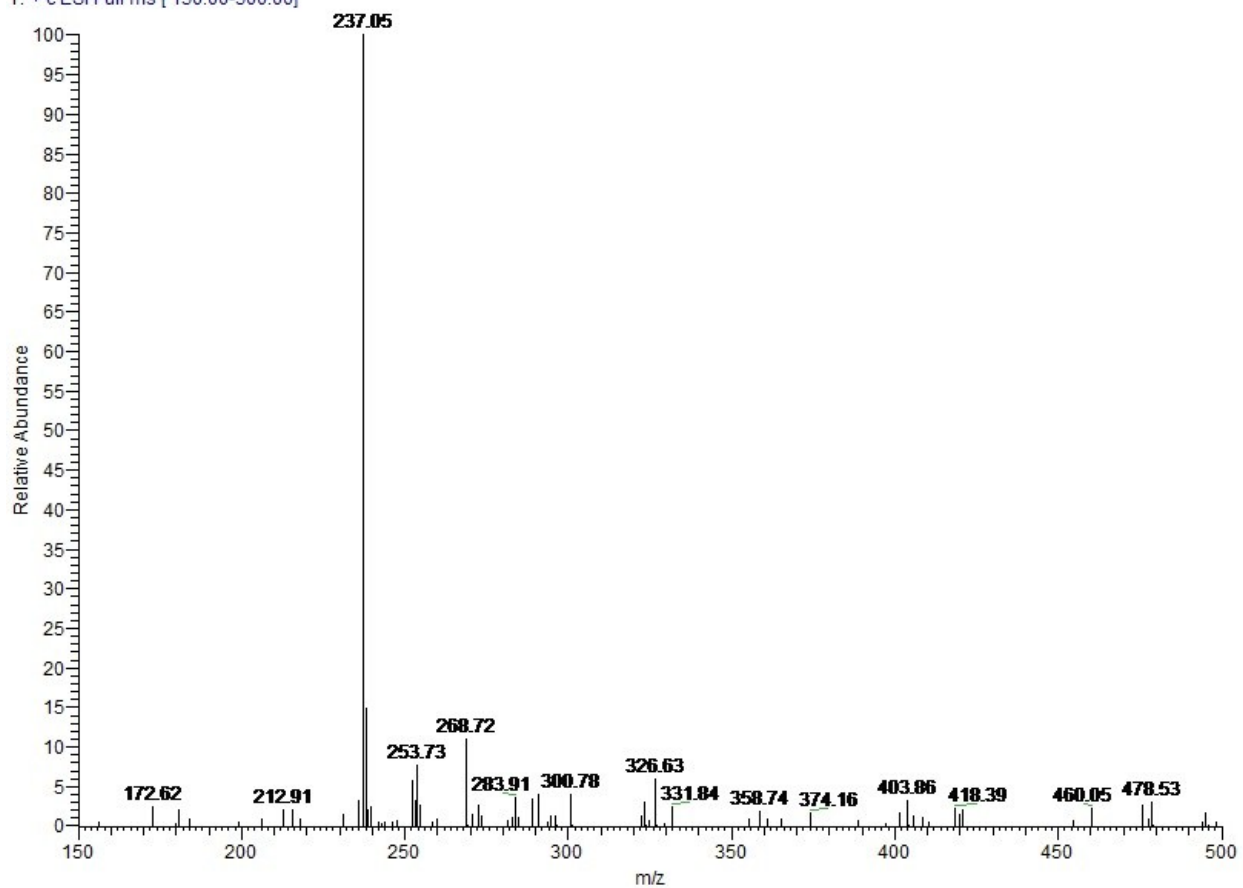

Fig. S2  $^1\text{H}$  NMR spectrum of ADMPA in DMSO- $d_6$

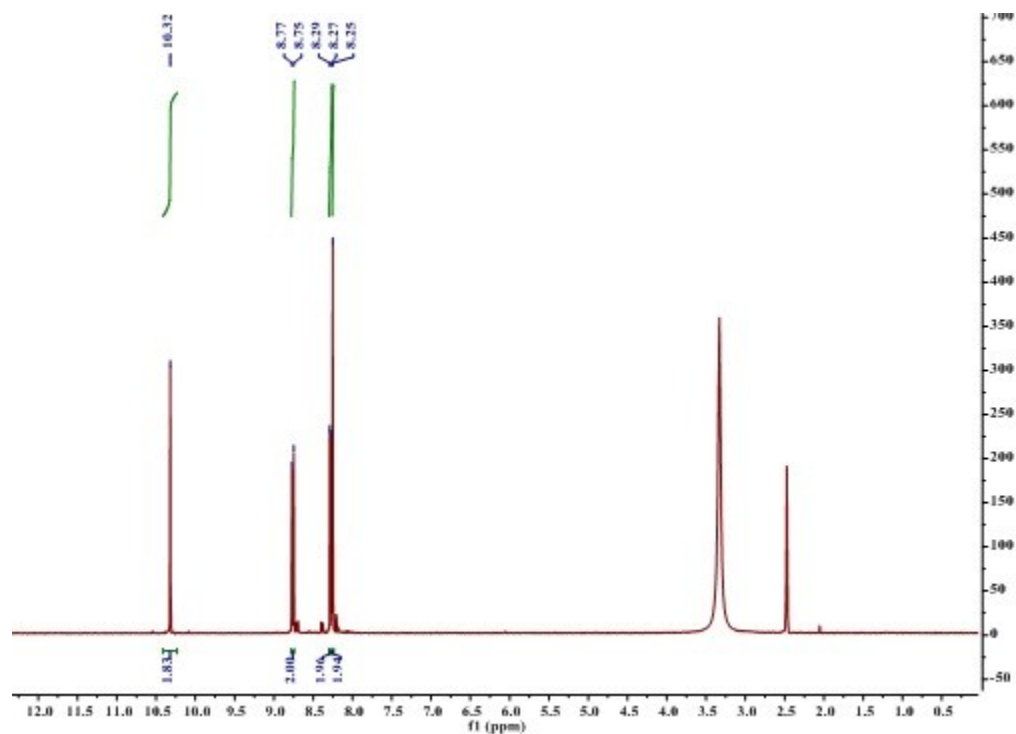

Fig. S3  $^1\text{H}$  NMR spectrum of ADMPA in DMSO- $d_6$

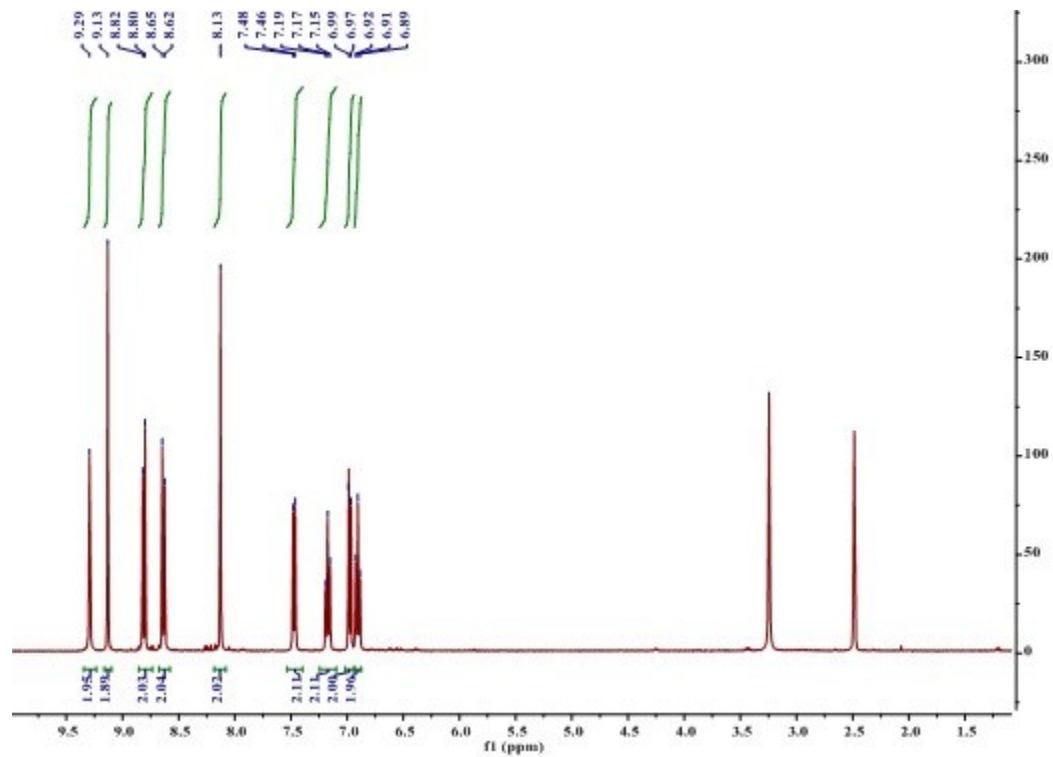

Fig. S4  $^{13}\text{C}$  NMR spectrum of ADMPA in DMSO-d<sub>6</sub>

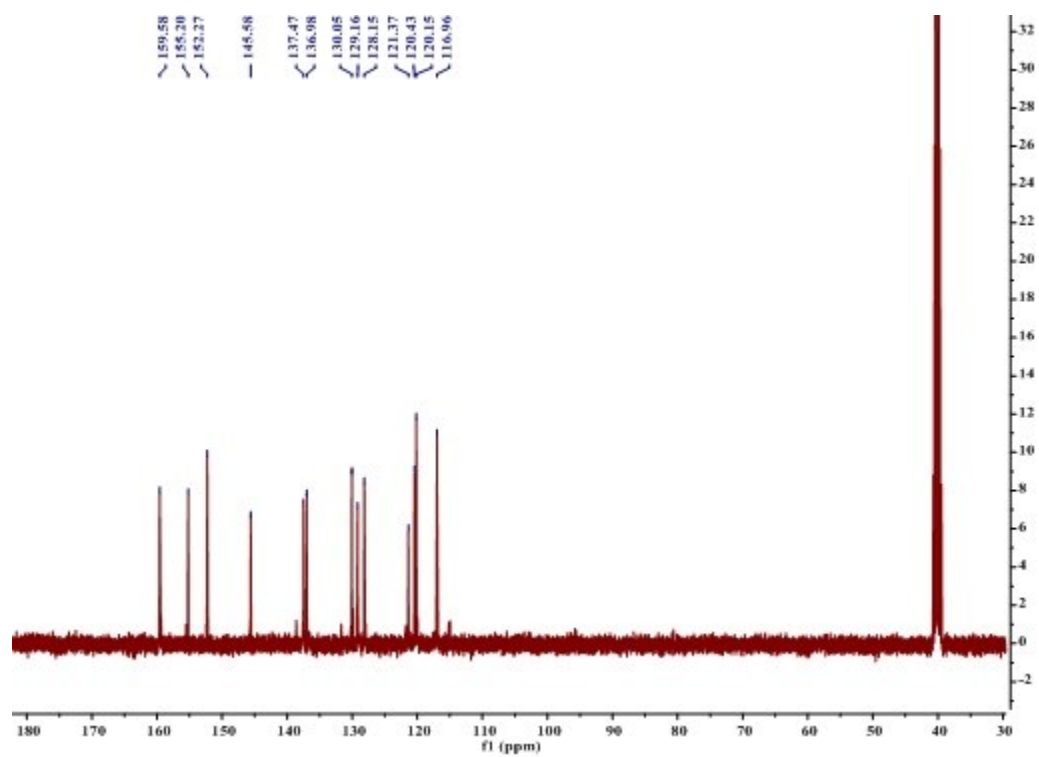

Fig. S5 The influence of mixed metal ions on the interaction between ADMPA (5  $\mu\text{M}$ ) and  $\text{Cd}^{2+}$ (5  $\mu\text{M}$ ) in DMF-water (v/v, 3:7)

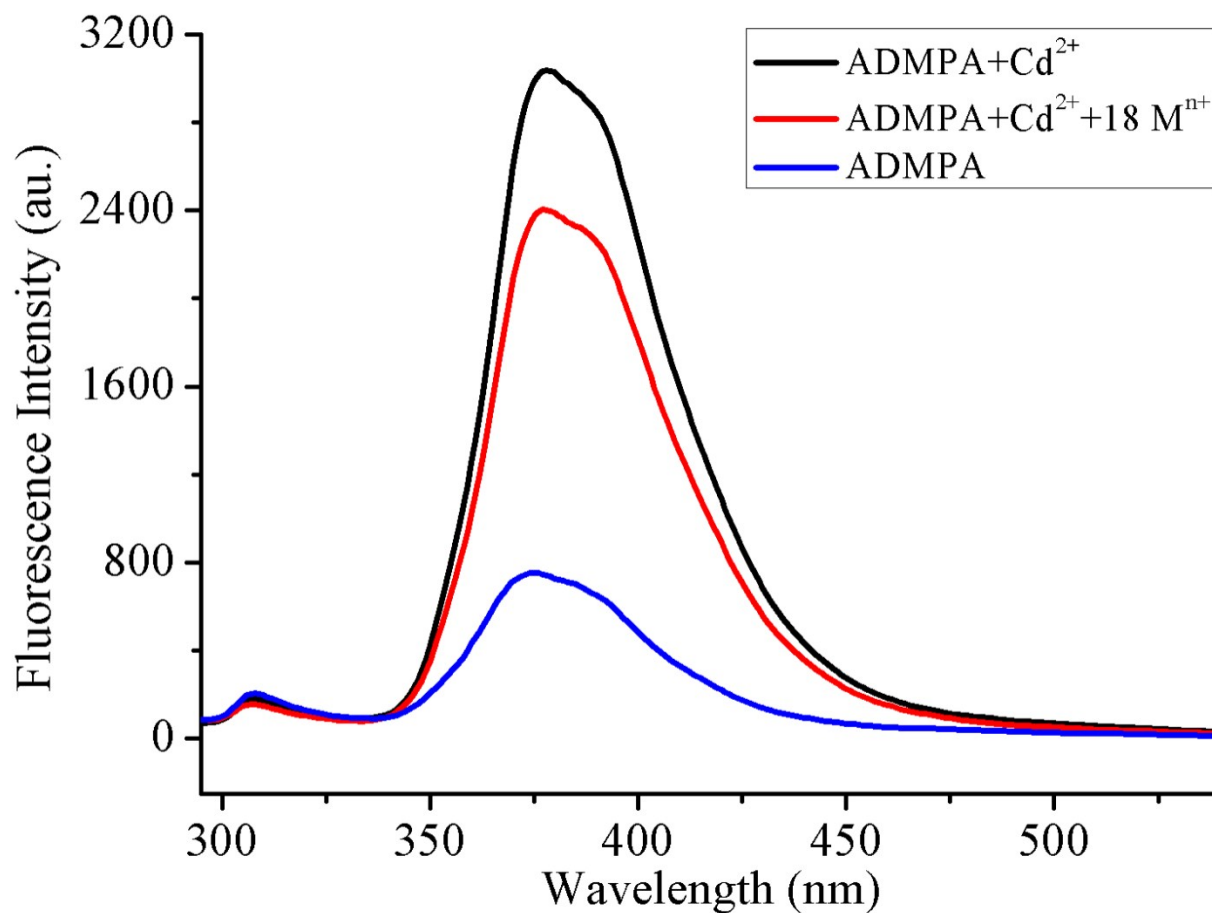

Table S1 Elemental analysis of ADMPA

| Run # | Weight<br>(mg) | Carbon (wt. %) | Hydrogen (wt. %) | Nitrogen (wt. %) |
|-------|----------------|----------------|------------------|------------------|
| ADMP  | 2.557          | 74.26          | 3.96             | 13.68            |
| A     |                |                |                  |                  |
